# Supplementary material
Source: PubMed Central journal article supplement (PMC2602585)
Supplement: mmc1.pdf [file mmc1.pdf]

## Implications of mortality transition for primary health care in rural South Africa: a population-based surveillance study

|                                                     | 35-49 years             |                         |                         | 50-64 years          |                         |                         | ≥65 years               |                         |                         | Total                   |                         |                         | p value |
|-----------------------------------------------------|-------------------------|-------------------------|-------------------------|----------------------|-------------------------|-------------------------|-------------------------|-------------------------|-------------------------|-------------------------|-------------------------|-------------------------|---------|
|                                                     | Women                   | Men                     | Both                    | Women                | Men                     | Both                    | Women                   | Men                     | Both                    | Women                   | Men                     | Both                    |         |
| Hypertension* (n=359)                               | 33 (27%)                | 6 (30%)                 | 39 (27%)                | 38 (46%)             | 17 (45%)                | 55 (46%)                | 46 (69%)                | 15 (54%)                | 61 (64%)                | 117 (43%)               | 38 (44%)                | 155 (43%)               | 0.8     |
| Cigarette smokers† (n=398)                          | 9 (6%)                  | 8 (31%)                 | 17 (10%)                | 6 (7%)               | 10 (26%)                | 16 (13%)                | 18 (25%)                | 9 (31%)                 | 27 (27%)                | 33 (11%)                | 27 (29%)                | 60 (15%)                | <0.0001 |
| Cholesterol (mmol/L)‡ (n=266)                       | 4.2<br>(4.0-4.4)        | 4.3<br>(3.7-4.9)        | 4.3<br>(4.1-4.4)        | 4.7<br>(4.5-4.9)     | 4.1<br>(3.7-4.5)        | 4.5<br>(4.3-4.7)        | 5.0<br>(4.7-5.3)        | 4.5<br>(4.2-4.9)        | 4.8<br>(4.6-5.1)        | 4.5<br>(4.3-4.7)        | 4.3<br>(4.0-4.5)        | 4.5<br>(4.4-4.6)        | 0.08§   |
| HDL cholesterol (mmol/L)‡ (n=266)                   | 1.4<br>(1.3-1.5)        | 1.5<br>(1.1-1.9)        | 1.4<br>(1.3-1.5)        | 1.5<br>(1.4-1.6)     | 1.7<br>(1.5-1.9)        | 1.6<br>(1.5-1.7)        | 1.5<br>(1.4-1.6)        | 1.5<br>(1.3-1.7)        | 1.5<br>(1.4-1.6)        | 1.4<br>(1.4-1.5)        | 1.6<br>(1.4-1.7)        | 1.5<br>(1.4-1.5)        | 0.07§   |
| Overweight (BMI 25-29.9 kg/m <sup>2</sup> ) (n=357) | 47 (35%)                | 4 (22%)                 | 51 (34%)                | 28 (36%)             | 7 (19%)                 | 35 (31%)                | 17 (26%)                | 4 (15%)                 | 21 (23%)                | 92 (33%)                | 15 (19%)                | 107 (30%)               |         |
| Obese (BMI ≥30 kg/m <sup>2</sup> ) (n=357)          | 38 (29%)                | 0                       | 38 (25%)                | 24 (31%)             | 2 (6%)                  | 26 (23%)                | 16 (25%)                | 3 (11%)                 | 19 (21%)                | 78 (28%)                | 5 (6%)                  | 83 (23%)                |         |
| BMI (kg/m <sup>2</sup> ) (n=359)                    | 28.0<br>(26.5-<br>29.5) | 22.4<br>(20.9-<br>23.8) | 27.3<br>(26.0-<br>28.6) | 27.1 (25.8-<br>28.5) | 22.2<br>(20.7-<br>23.6) | 25.6<br>(24.5-<br>26.7) | 25.9<br>(24.3-<br>27.4) | 23.8<br>(21.1-<br>26.6) | 25.3<br>(24.0-<br>26.6) | 27.2<br>(26.4-<br>28.1) | 22.8<br>(21.7-<br>23.9) | 26.2<br>(25.5-<br>27.0) | <0.0001 |

Data are number (%) or mean (95% CI). BMI=body-mass index. \*Defined as systolic blood pressure 140 mm Hg or more, diastolic blood pressure 90 mm Hg or more, or taking antihypertensive treatment. †Defined as current daily cigarette smoker. ‡Non-fasting measurement. §Analysis of variance comparing mean values in women and men. ¶Table derived by M Connor. Source: Thorogood M, Connor M, Tollman S, Lewando Hundt G, Fowkes G, Marsh J. A cross-sectional study of vascular risk factors in a rural South African population: data from the Southern African Stroke Prevention Initiative (SASPI). *BMC Public Health* 2007; 7: 326.

**Webtable:** Vascular risk factors in adults aged 35 years and older in Agincourt, 2003¶

Correspondence to:  
 Stephen M Tollman  
 Director, MRC/Wits Rural Public  
 Health and Health Transitions  
 Research Unit (Agincourt),  
 School of Public Health, Faculty  
 of Health Sciences, University of  
 the Witwatersrand, 7 York Road,  
 Parktown 2193, Johannesburg,  
 South Africa  
 Stephen.Tollman@wits.ac.za
